# Supplementary material for: Identification of Novel Loci Involved in Adalimumab Response in Crohn’s Disease Patients Using Integration of Genome Profiling and Isoform-Level Immune-Cell Deconvoluted Transcriptome Profiling of Colon Tissue
Source: MDPI journal article supplement (doi:10.3390/pharmaceutics14091893), 2022-09-07
Supplement: s1 [file s1]

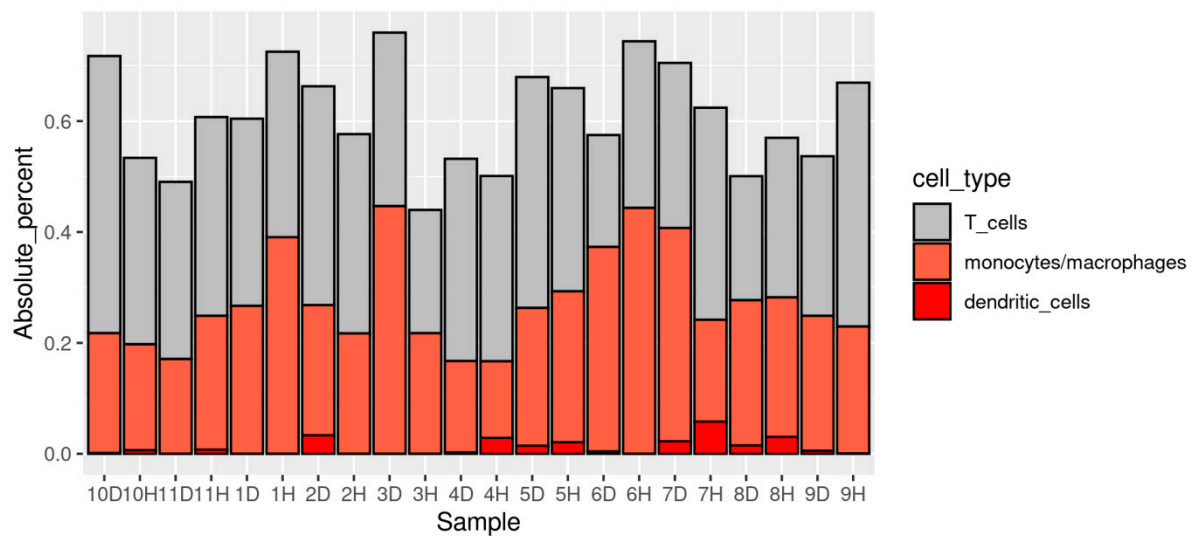

**Figure S1.** Deconvolution fractions of tissue samples. H: healthy tissue; D: Inflamed tissue.

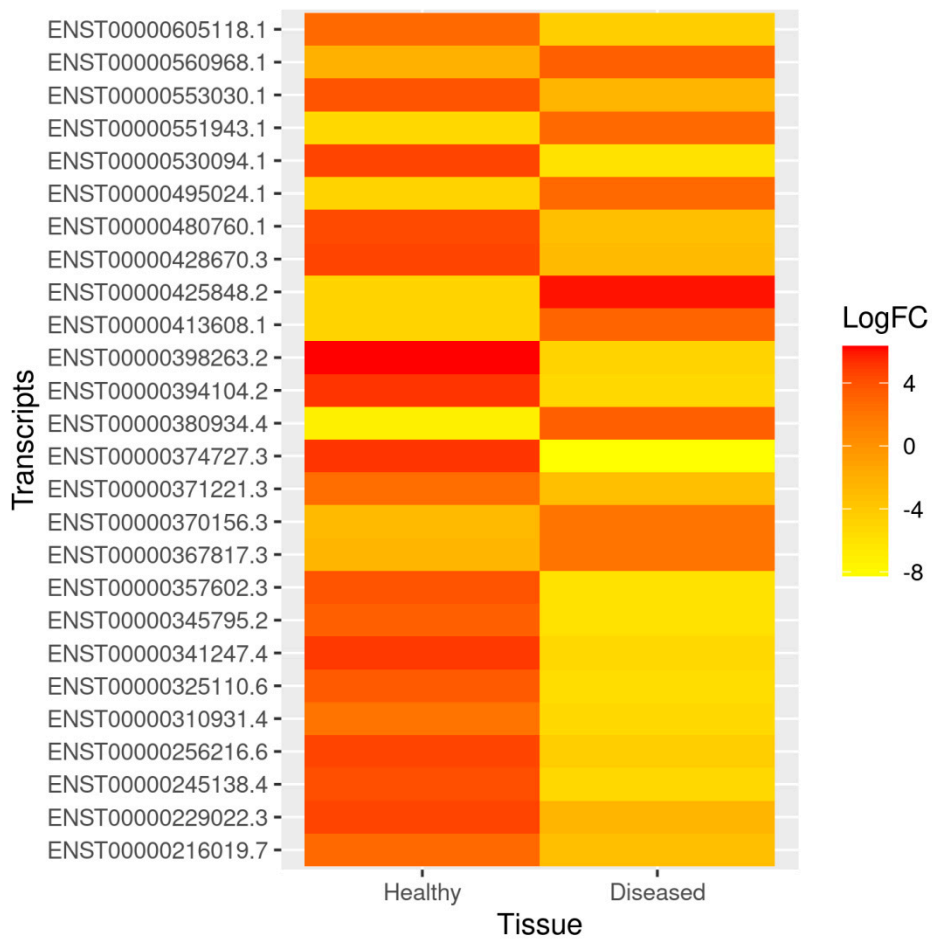

**Figure S2.** Statistically significant differentially expressed transcripts showing opposite direction in healthy and inflamed tissue in first approach.

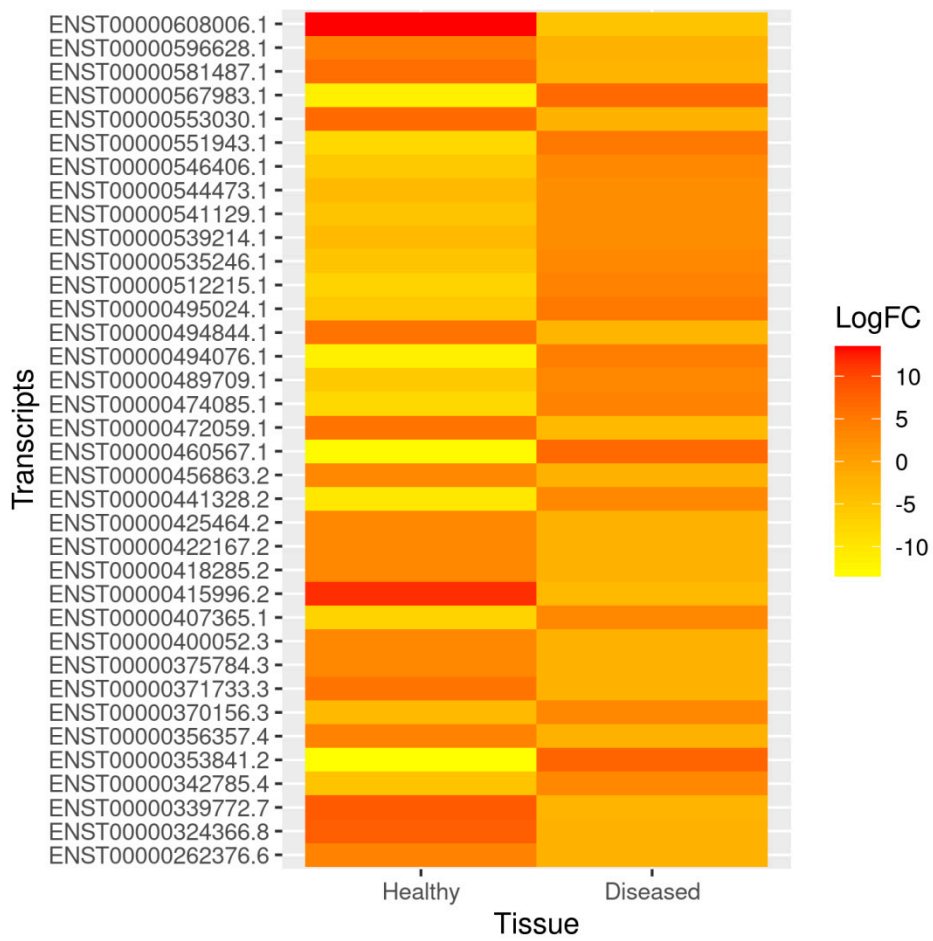

**Figure S3.** Statistically significant differentially expressed transcripts showing opposite direction in healthy and inflamed tissue in second approach.

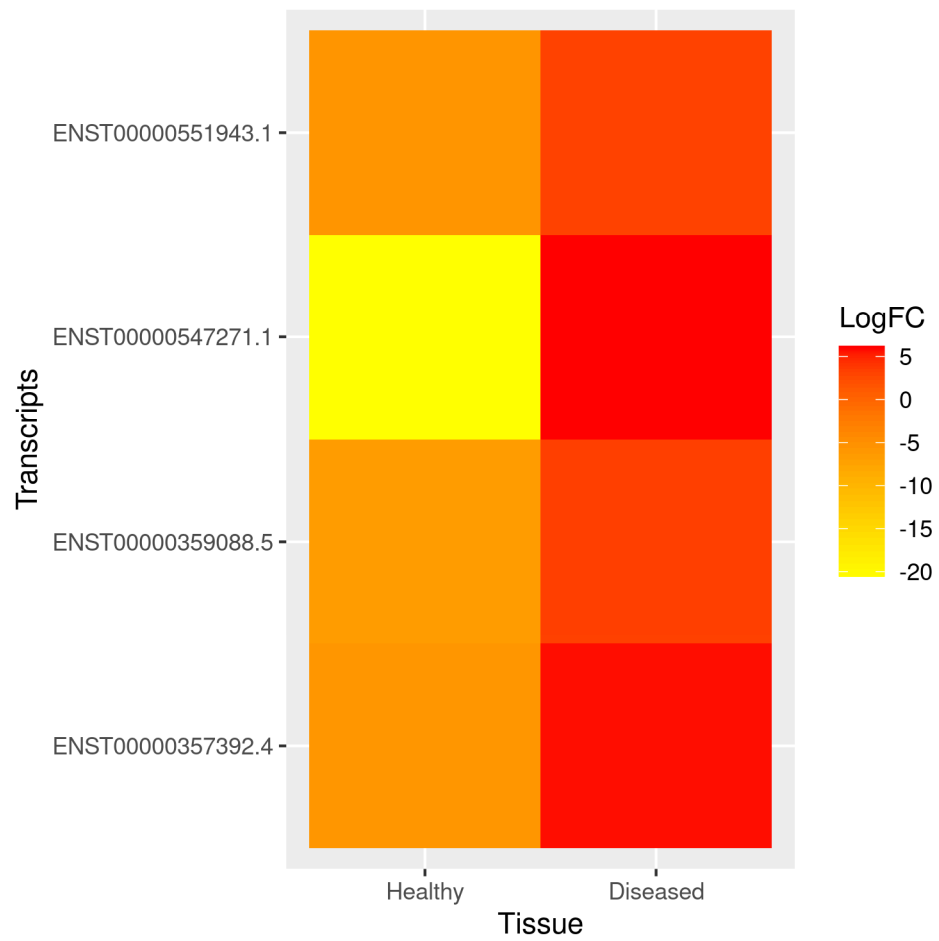

**Figure S4.** Statistically significant differentially expressed transcripts showing opposite direction in healthy and inflamed tissue in third approach.

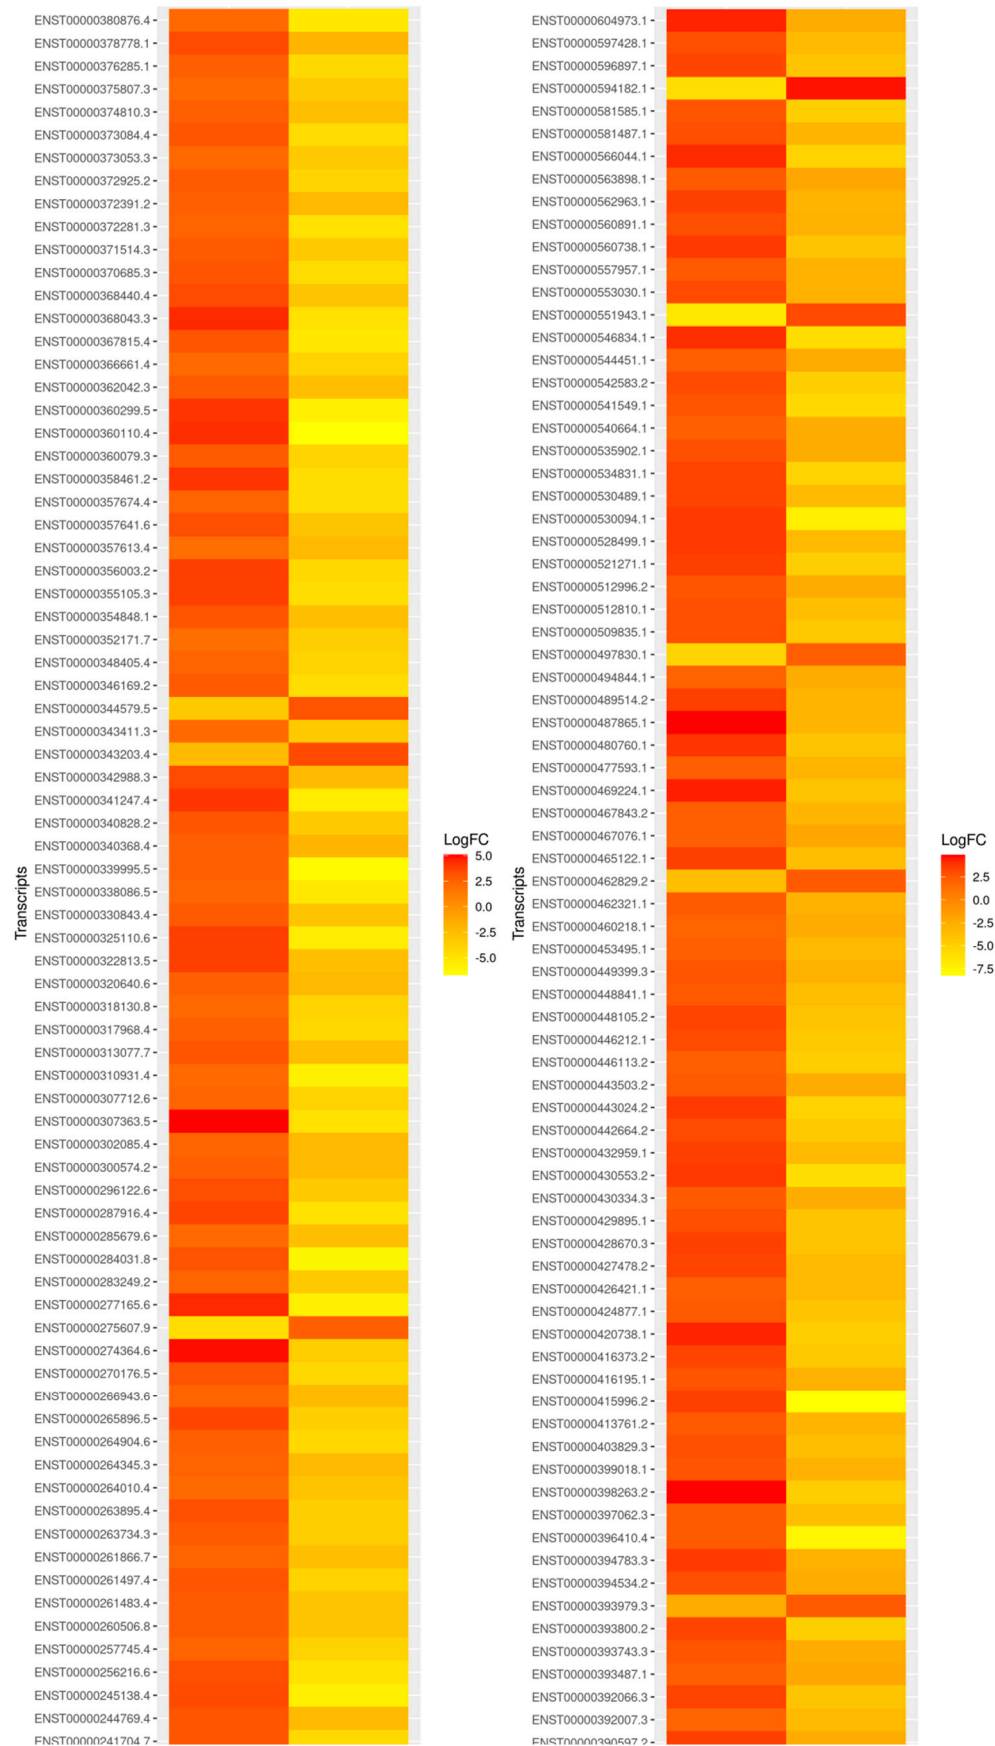

**Figure S5.** Statistically significant differentially expressed transcripts showing opposite direction in healthy and inflamed tissue in fourth approach.

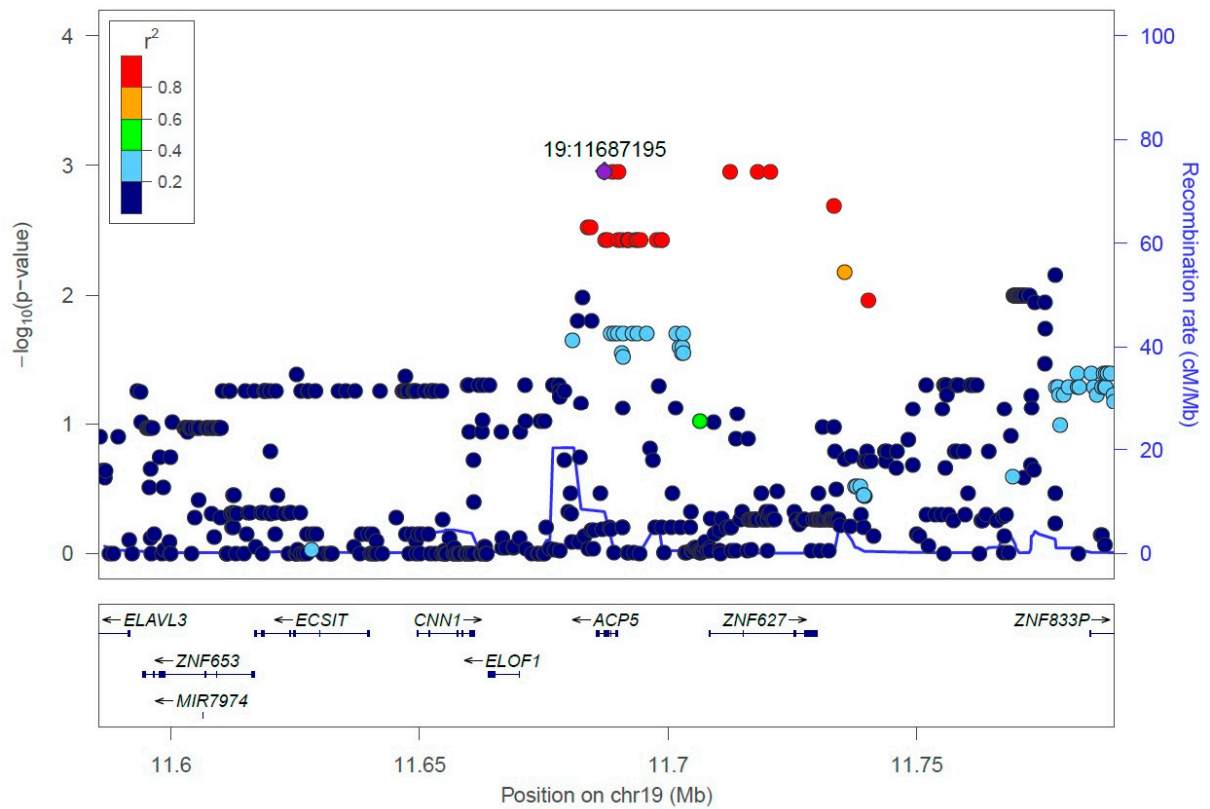

**Figure S6.** Regional manhattan plot of *ACP5* gene/locus.

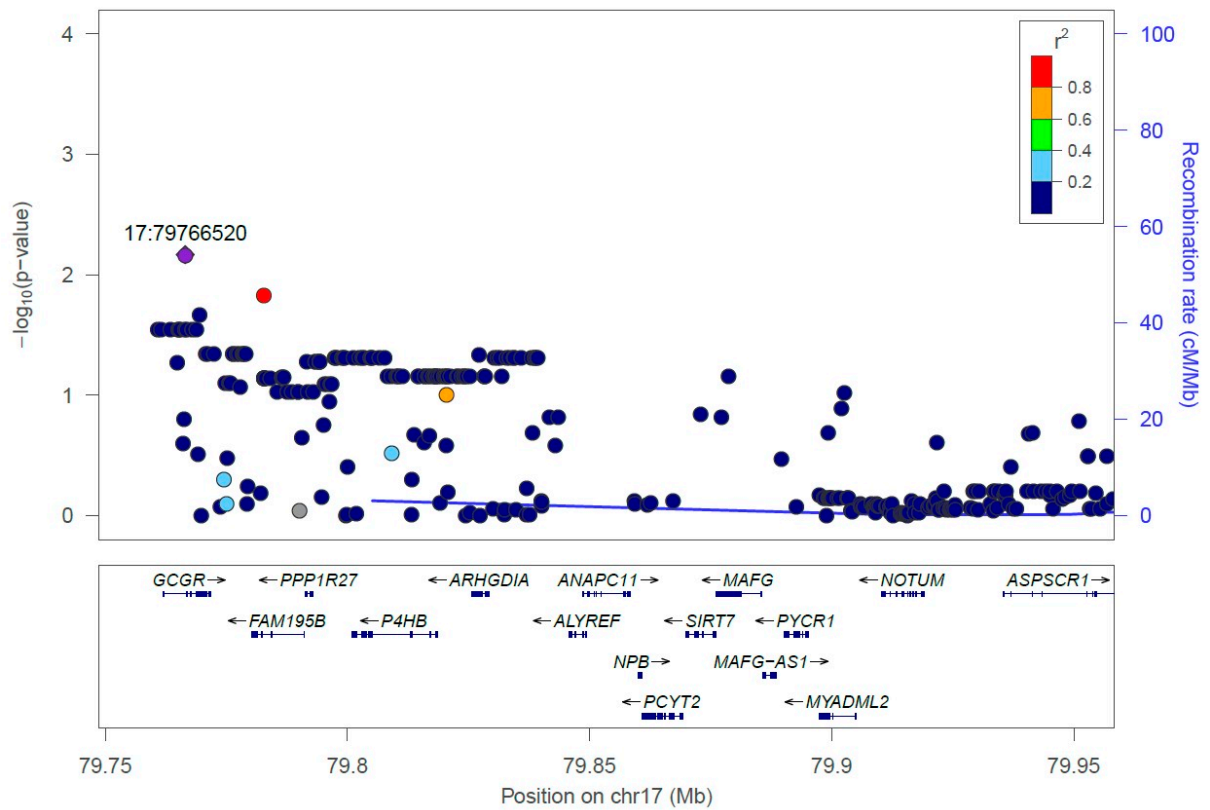

**Figure S7.** Regional manhattan plot of *ANAPC11* gene/locus.

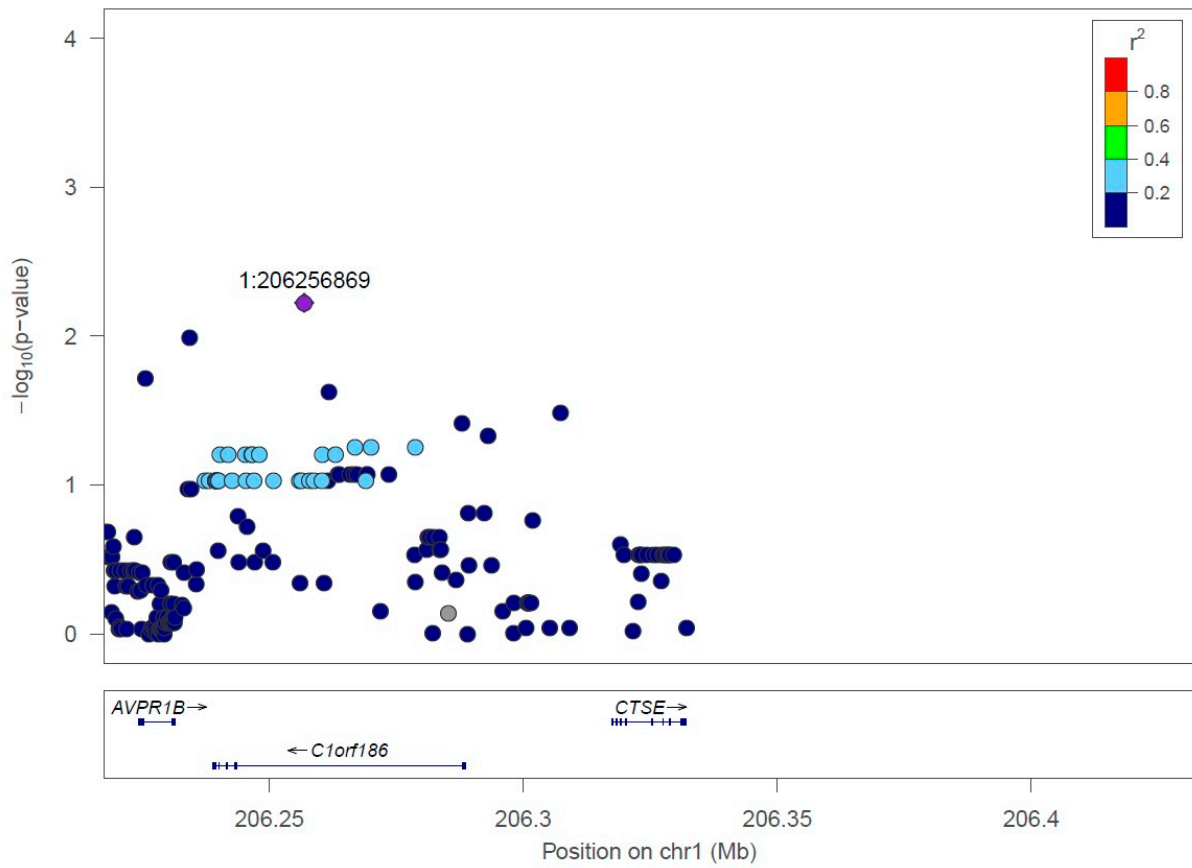

**Figure S8.** Regional manhattan plot of *CTSE* gene/locus.

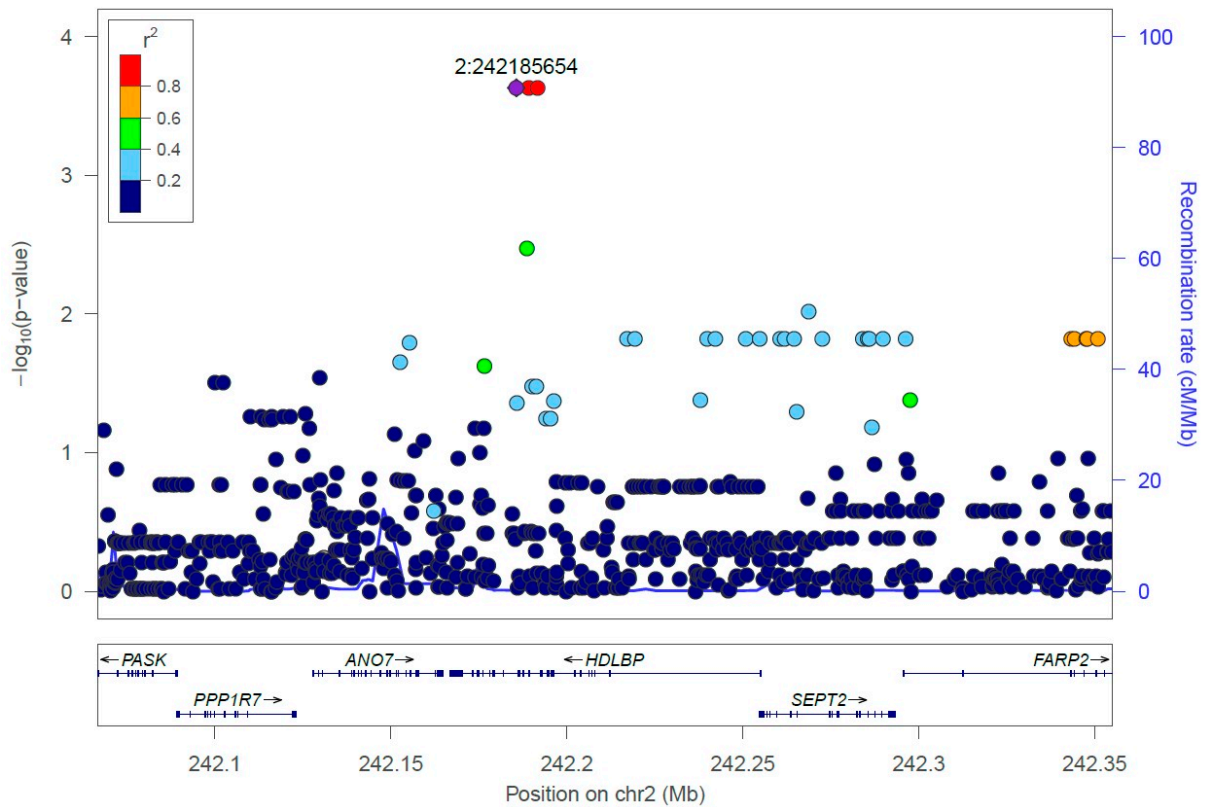

**Figure S9.** Regional manhattan plot of *HDLBP* gene/locus.



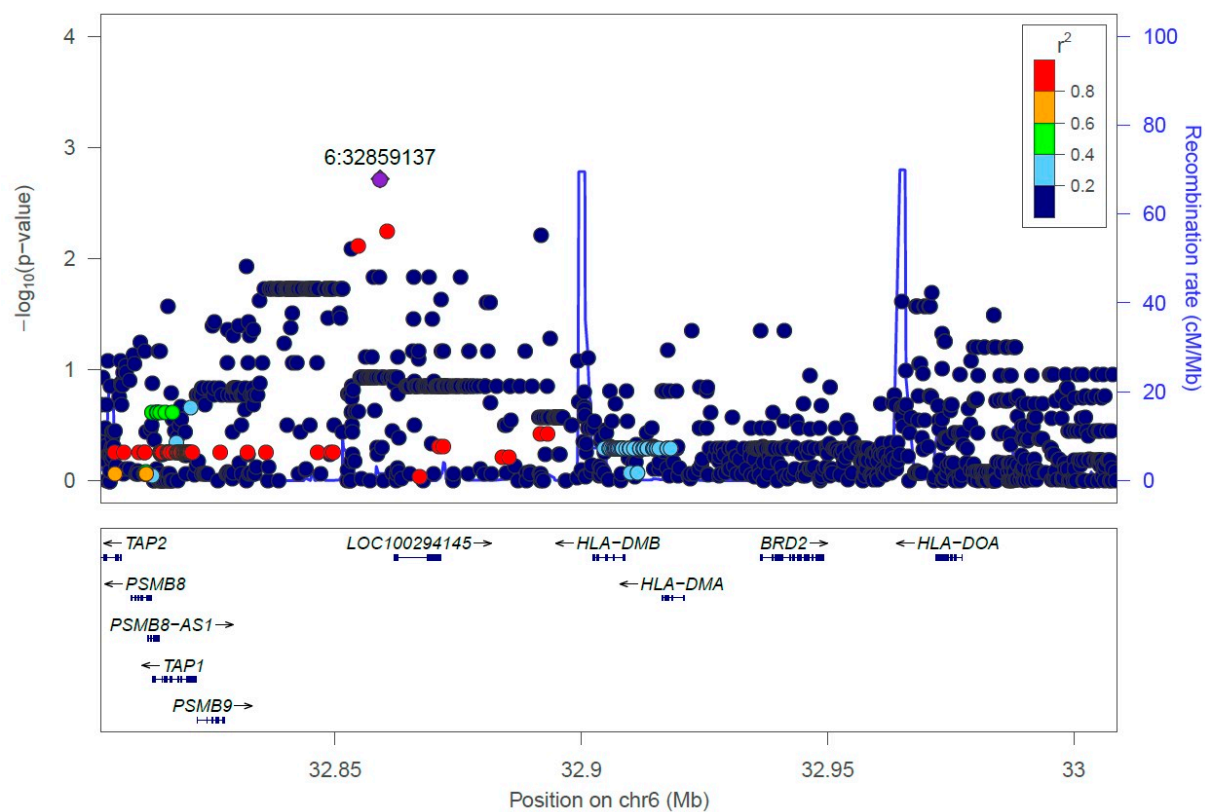

**Figure S10.** Regional manhattan plot of *HLA-DMB* gene/locus.

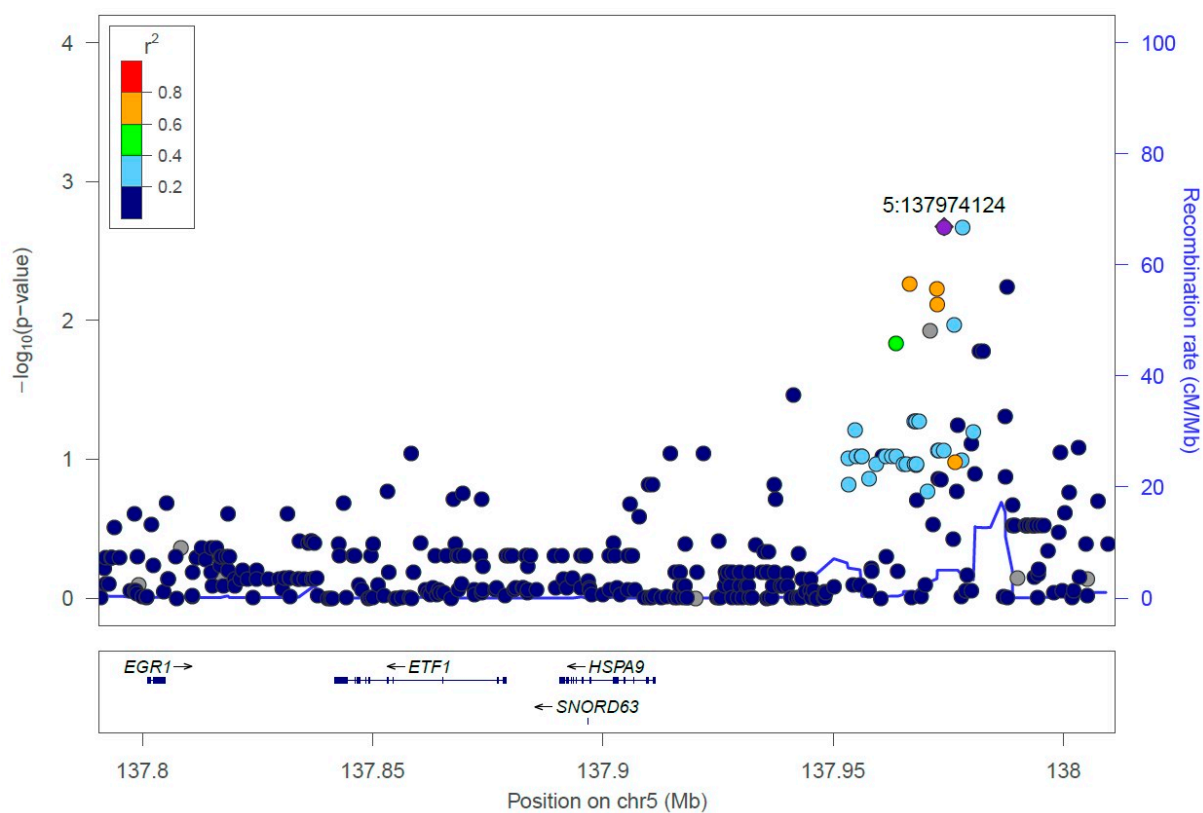

**Figure S11.** Regional manhattan plot of *HSPA9* gene/locus.



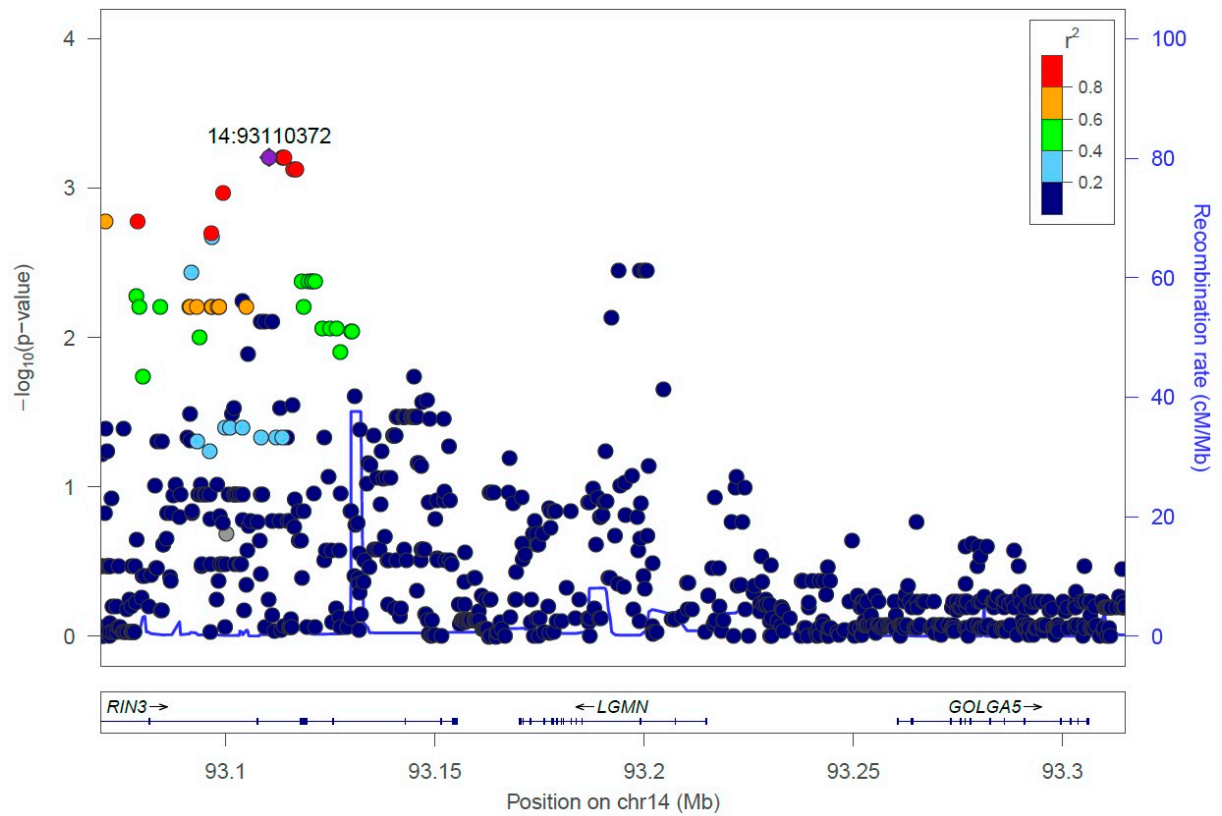

**Figure S12.** Regional manhattan plot of *LGMN* gene/locus.

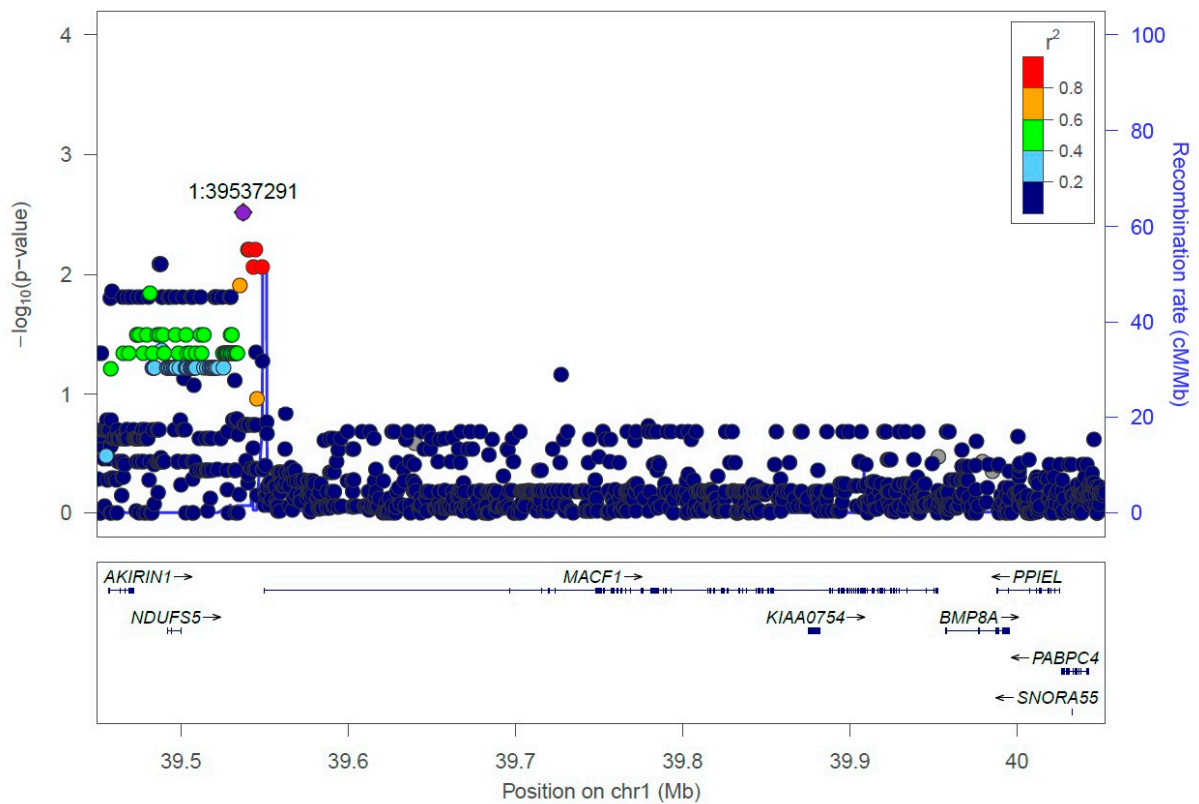

**Figure S13.** Regional manhattan plot of *MACF1* gene/locus.

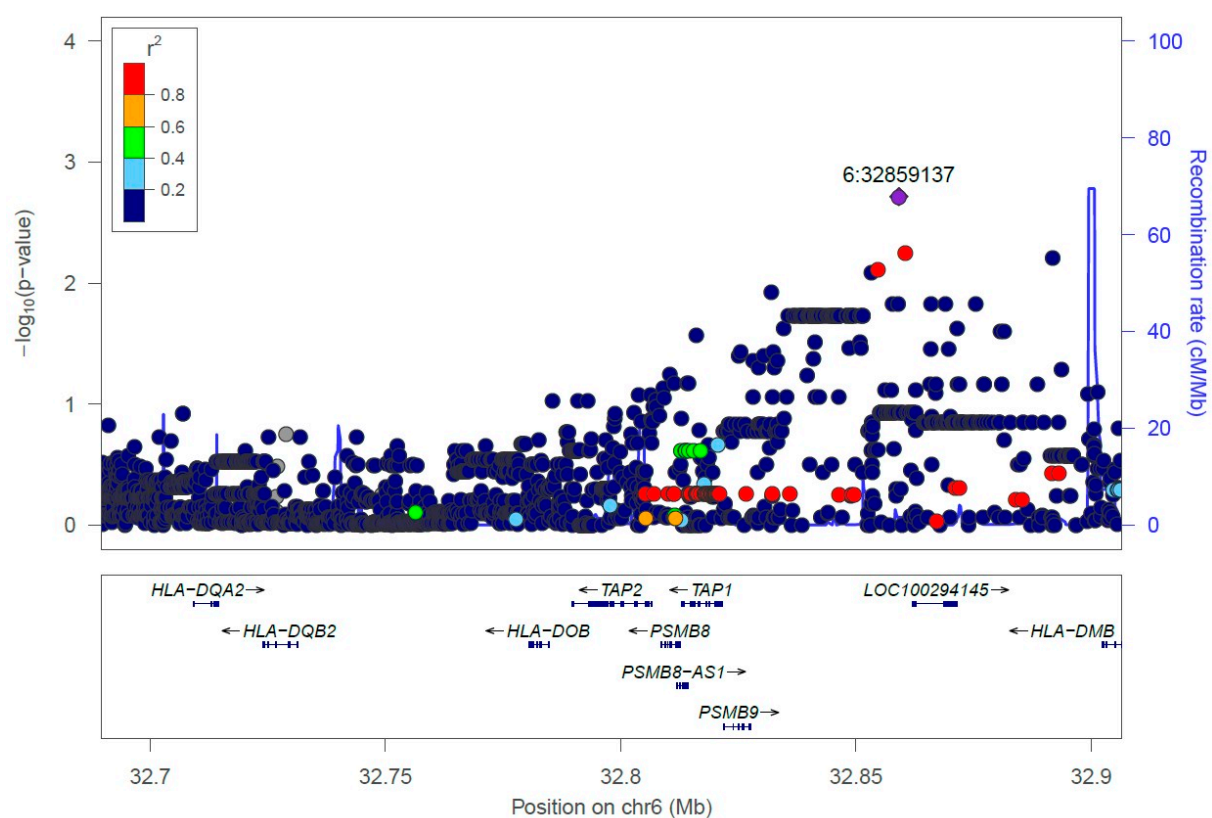

**Figure S14.** Regional manhattan plot of *TAP2* gene/locus.

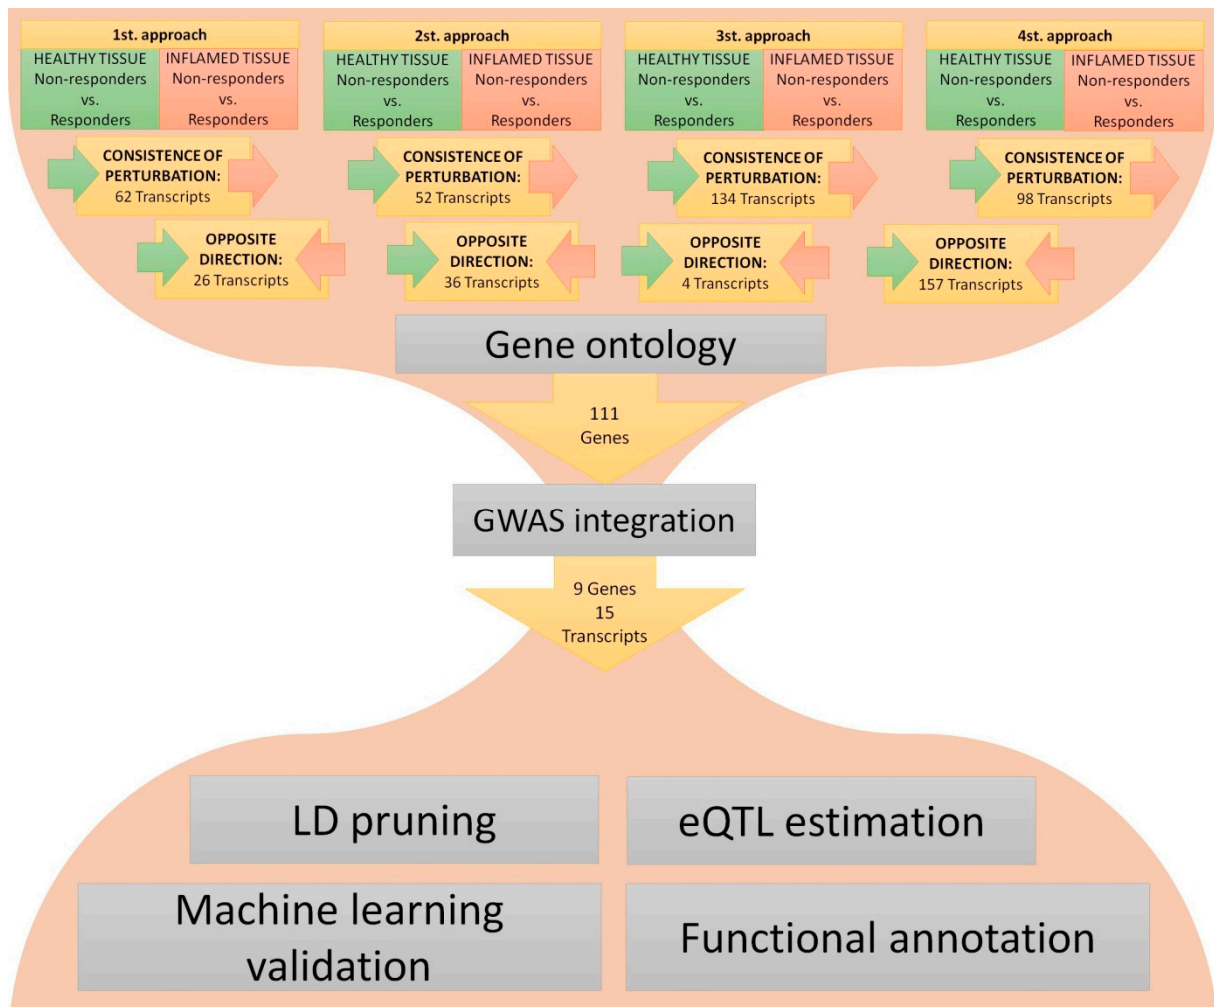

**Figure S15.** Approach and analyses flowchart.
